1  
2  
3  
4  
5  
6  
7  
8  
9  
10  
11  
12  
13  
14  
15  
16  
17  
18  
19  
20  
21  
22  
23  
24  
25  
26  
27  
28  
29  
30  
31  
32

The prevalence of vitamin D deficiency between Saudis and non-Saudis in Al-Madinah  
Al-Munawarah a cross-sectional study

Running headed: Vitamin D deficiency in Saudis and non-Saudis

Muhammed Hassan Nasr <sup>1\*</sup>, Noordin Othman <sup>2</sup>, Bassam Abdulrasol Hassan <sup>3</sup>, Mahmathi Karoppannan <sup>4</sup>, Noorizan Binti Abdulaziz<sup>5</sup>, Mohammed Ahmed Alsarani<sup>6</sup>, Mohammed Husain Eskembaji<sup>7</sup>

<sup>1</sup>Clinical Pharmacy Department, Faculty of Pharmacy, Taibah University, Al-Madinah Al-Munawarah, Saudi Arabia.

<sup>2</sup>Quality Use of Medicines in Umrah and Hajj Pilgrimage Research Group, Department of Clinical and Hospital Pharmacy, Faculty of Pharmacy, Taibah University, Al-Madinah Al-Munawarah, Saudi Arabia.

<sup>3</sup>Clinical Pharmacy Department, Faculty of Pharmacy, Universiti Teknologi MARA, Selangor, Malaysia.

<sup>4</sup>Clinical Pharmacy Department, Faculty of Pharmacy, Universiti Teknologi MARA, Selangor, Malaysia.

<sup>5</sup>Clinical Pharmacy Department, Faculty of Pharmacy, Management and Science University.

<sup>6</sup>Laboratory Department, Medical Care Unit, Taibah University, Al-Madinah Al-Munawarah, Saudi Arabia.

<sup>7</sup>Laboratory Department, Medical Care Unit, Taibah University, Al-Madinah Al-Munawarah, Saudi Arabia.

\* Muhammed Hassan

E-mail: [mohamednasr5@hotmail.com](mailto:mohamednasr5@hotmail.com) (MH)

33

## 34 INTRODUCTION

35

36 Vitamin D is one of the vitamins that are soluble in fat. It is also classified as a  
37 prohormone steroid, (1). Vitamin D has important functions in the endocrine, paracrine  
38 and autocrine systems, as so, it is regarded as the “sunshine” vitamin (2,3). Naturally, only  
39 two forms of vitamin D are available; vitamin D<sub>2</sub>, also known as ergocalciferol, and  
40 vitamin D<sub>3</sub> (cholecalciferol). Photosynthesis of vitamin D in the skin by the induction of  
41 sunlight produces only cholecalciferol, while the dietary sources of vitamin D can provide  
42 the vitamin in the two forms (3).

43

44 Globally, Vitamin D deficiency is among the major public health issues (4,5). The  
45 deficiency in vitamin D in children leads to a disease called rickets in which bone tissue  
46 fails to mineralize properly, causing skeletal deformities and brittle bones (1,6–8). While,  
47 the deficiency in vitamin D in adults leads to weakness in the muscles and consequently,  
48 increasing the risk of falls and fractures. In adults, vitamin D deficiency causes another  
49 disease called osteomalacia, leading to the weakness of bones and exacerbate osteoporosis  
50 (1,6).

51

52 Numerous data have been documented on the link between ethnicity, colour of skin and  
53 vitamin D serum levels (9,10). In the United States, 90% or more of the non-Hispanic  
54 African American were found to have vitamin D levels around 15 ng/mL, the mean  
55 vitamin D level of Hispanics was 20 ng/mL, while that of the non-Hispanics white was 26  
56 ng/mL, whereas those individuals residing the traditional counties in Central Africa were  
57 showed to have mean plasma 25(OH) D levels of about 46 ng/mL (1,11).

58

59 In the Middle East and North Africa (MENA), especially the Kingdom of Saudi Arabia  
60 (KSA), high prevalence of vitamin D deficiency has been reported despite the abundance  
61 of sunshine (12,13). In 2015, a cross-sectional national multistage survey reported that the  
62 prevalence of vitamin D deficiency was 40.6% in male Saudis and 62.65% in female  
63 Saudis (14). Similar results were found in other, studies that were conducted in various  
64 places in KSA. Two studies that were conducted in Riyadh indicated that vitamin D  
65 deficiency among Saudi men was 87.8% (15), and; 78.1% in Saudi females and 72.4% in  
66 Saudi males respectively (16). In Damam the prevalence of vitamin D deficiency was  
67 found to be greater than 65% (17). Furthermore, Dabbour and colleagues (2016a study)  
68 conducted in Makkah estimated that vitamin D levels were very low among the healthy  
69 Saudis population ( $5.26 \pm 2.59$  ng/ml) (4).

70

71 To our knowledge, up to know no study has yet been conducted to compare the prevalence  
72 of vitamin D deficiency between Saudis and non-Saudis living in the same area. This will  
73 be the first study to document Vitamin D status in Al- Madinah Al-Munawwarah. Also,  
74 this paper will examine predictors of such deficiency.

75

76

## 77 **Methods**

78

### 79 **Subjects and Study Design**

80

81 This was a cross-sectional study conducted in Al-Madinah Al-Munawwarah, KSA from  
82 October 2017 to May 2018. This period of eight months was chosen to reduce seasonality  
83 bias as June, July, August and September are the hottest summer months in KSA. The  
84 ethical approval was obtained before the beginning of the study; in October 2017, from  
85 Taibah University College of Dentistry Research Ethics Committee (TUCD-REC), which  
86 is the ethical review board in Taibah University.

87 Non-diabetic male Saudis and non-Saudis nationalities age between 18 to 65 years old  
88 attended Medical Unit, Taibah University were included in this study. Participants were  
89 excluded from the study if they consume vitamin D supplementations, diagnosed with  
90 renal, liver or cancer, thyroid or parathyroid diseases and receiving any drug interacting  
91 with vitamin D such steroids, orlistat, cholestyramine, phenytoin and phenobarbital. Based  
92 on the sample size calculation, a sample size of 65 encounters per study arm; 33 in group  
93 one (Saudis) and 32 in group two (non-Saudis) would detect the degree of difference with  
94 80% power at  $\alpha = 0.05$ .

95 Prior participants' enrollment commenced, demographic data, a detailed history of  
96 diabetes (if present), socio-economic data, information about intake of vitamin D-  
97 containing diets, exposure period to sunlight per day were collected. Completion and  
98 return of written informed consent before participating in the study indicated voluntary  
99 agreement to participate in this study.

100

101

102

103

104

105

106

107

## 108 **Data Collection**

109

### 110 **Anthropometric Data**

111 The weight was measured in kilograms and rounded to the nearest 100 grams. Standard  
112 beam scale was used to measure the weight of participants. The participants weighed  
113 wearing light clothes and barefoot

114 A calibrated height board was attached to the scale to measure the height in centimeters.  
115 Weight in kilograms were divided by the square of height in meters to calculate the BMI.  
116 The body mass index (BMI) was used to evaluate obesity. Participants with BMI between  
117 25 and 29.9 kg/m<sup>2</sup> were considered overweight, participants with BMI between 30 and  
118 39.9 kg/m<sup>2</sup> were considered obese participants. While, when BMI found to be > 40 kg/m<sup>2</sup>  
119 then they were considered morbidly obese. Determination of the waist circumference was  
120 done by measuring the broadest area between the edge of lower ribs and the iliac crest.

121

### 122 **Blood Sample Collection and Laboratory Analysis**

123

124 Five millilitres of blood were collected by trained technicians. This was done under the  
125 supervision and guidance of the primary care physicians. Blood tubes were preserved in a  
126 cooler or refrigerator immediately. The time of preservation was not less than 30 minutes  
127 and did not exceed four hours before the technicians centrifuge them. The centrifugation  
128 process was done for about half an hour at 3000 RPM at 4°C. Following that, the  
129 technicians immediately separated the serum from the whole blood and freeze them at -  
130 20°C. This was done at the biochemistry laboratory at the Medical Unit, Faculty of  
131 Medicine, Taibah University, Al-Madinah.

132

133 The 25-hydroxyvitamin D levels were measured by ECLIA assay by Cobas machine e  
134 411. The level were considered as deficient (< 20 ng/ml), inadequate (20 –30 ng/ml) and  
135 adequate (30 ng/ml) as recommended by the American Endocrine Society Clinical  
136 Practice Guidelines (2,18).

137

### 138 **Results:**

139 A total of sixty-five healthy participants were recruited in the study, subdivided into two  
140 groups, 33 Saudis and 32 non-Saudis. The sample size was estimated to provide 80%

141 power to detect a difference in vitamin D deficiency between the 2 groups at a two-sided  
142 0.05 significance level.

143 (25-hydroxyvitamin D) levels less than 20 ng/ml were considered as deficient, while  
144 levels between 20–30 ng/ml were considered insufficient, and levels greater than 30 ng/ml  
145 were considered adequate vitamin D.

146

147 **Table 1. Baseline Demographic and clinical characteristics of participants**

| Indicators                                       | Saudi (n= 33) | Non-Saudi (n= 32) | P-Value |
|--------------------------------------------------|---------------|-------------------|---------|
| Age ( years)                                     |               |                   |         |
| 18-40                                            | 30 (91%)      | 6 (18.75%)        |         |
| 41-65                                            | 3 (9%)        | 26 (81.25 %)      |         |
| Education level<br>(postgraduates)               | 4 (12.1%)     | 30 (93.8%)        | < 0.001 |
| BMI (kg/m <sup>2</sup> )                         | 28.85 ±4.55   | 27.3± 3.27        |         |
| Marital status                                   |               |                   |         |
| Married                                          | 25 (75.8%)    | 32 (100%)         | < 0.003 |
| Unmarried                                        | 8 (24.2%)     | 0 (0%)            |         |
| Smoking status<br>(current smoker)               | 17 (51.5%)    | 1 (3.1%)          | < 0.001 |
| Occupation status<br>(governmental<br>employees) | 31 (93.9%)    | 29 (90.6%)        | 0.6     |

148

149 The mean age of the Saudi group was  $33.6 \pm 7.2$  years and the median and mode were  
150 found to be 32 years, while the mean age of the non-Saudi group was  $46.8 \pm 8.1$  years,  
151 with median 45.5 and mode 43 years respectively.

152

### 153 *The marital status*

154 All the non-Saudi group were married (100%) versus only 75.8% (n = 25) of the Saudi  
155 group were married. A significant difference was found between the two groups in their  
156 marital status.

157

158 ***Smoking status***

159 The results of the present study showed that high percentage of the Saudi participants  
160 were current and active smokers (n=17, 51.5%) compared to the non-Saudi participants  
161 (n=1, 3.1%). Statistical analysis showed that there is a significant variation in the smoking  
162 status between Saudi and non-Saudi participants ( $p < 0.001$ ).

163 ***Education status***

164 Majority of the non-Saudi participants were post graduates, (n = 30, 93.8%) while only  
165 12.1% (n = 3) in the Saudi group was postgraduates. Therefore, a significant variation was  
166 detected between the two groups in their education status ( $p < 0.001$ ).

167

168 ***The occupation status***

169 The majority of both groups were governmental employees i.e. 93.9% (n = 31) Saudi and  
170 90.6% (n = 29) non-Saudi, while only 6.2% (n = 2) of Saudi and non-Saudi participants  
171 were students. Besides that, 3.1% (n = 1) of the non-Saudi group were without a job.  
172 However, the occupation status did not differ significantly between the two groups ( $p =$   
173 0.6).

174 **Figure 1. Nationalities of the non-Saudi participants (n=32)**

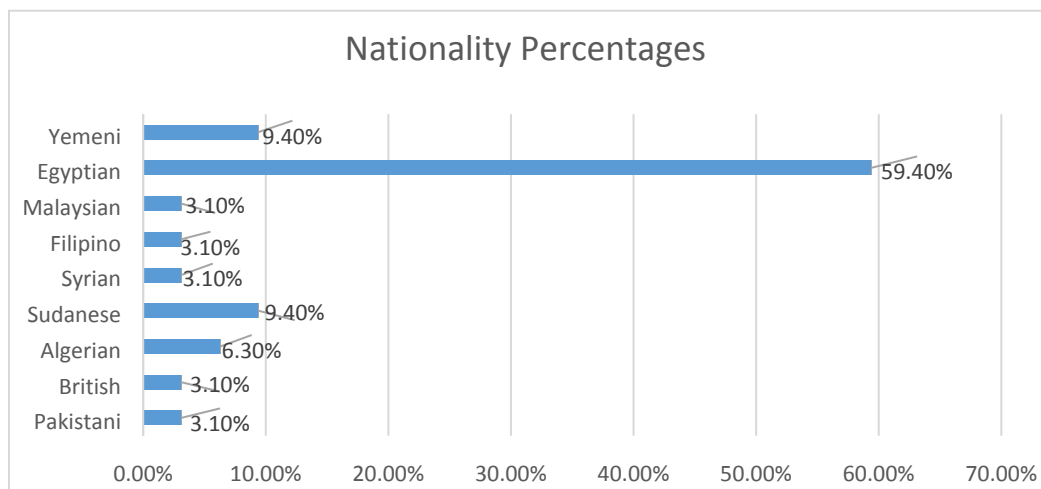

175

176

177 Majority of the non-Saudi participants were Egyptians (n = 19, 59.40%), followed by the  
178 Sudanese and Yemenis were 9.40% (n = 3) each, as shown in figure 1.

179

180

181

182

183 **Table 2. Dietary habits for the Saudi and non-Saudi participants**

|           | Saudi (n=33) |    | Non-Saudi (n=32) |    | Total |    | <i>p</i> -value |       |
|-----------|--------------|----|------------------|----|-------|----|-----------------|-------|
|           | No.          | %  | No.              | %  | No.   | %  |                 |       |
| Egg yolk  | never        | 1  | 3.0%             | 1  | 3.1%  | 2  | 3.1%            | 0.9   |
|           | monthly      | 1  | 3.0%             | 1  | 3.1%  | 2  | 3.1%            |       |
|           | 1 time/week  | 9  | 27.3%            | 7  | 21.9% | 16 | 24.6%           |       |
|           | 3 times/week | 17 | 51.5%            | 17 | 53.1% | 34 | 52.3%           |       |
|           | Daily        | 5  | 15.2%            | 6  | 18.8% | 11 | 16.9%           |       |
| Oily Fish | never        | 2  | 6.1%             | 6  | 18.8% | 8  | 12.3%           | 0.004 |
|           | monthly      | 17 | 51.5%            | 4  | 12.5% | 21 | 32.3%           |       |
|           | 1 time/week  | 11 | 33.3%            | 13 | 40.6% | 24 | 36.9%           |       |
|           | 3 times/week | 3  | 9.1%             | 9  | 28.1% | 12 | 18.5%           |       |
|           | never        | 2  | 6.1%             | 7  | 22.6% | 9  | 14.1%           |       |
| Liver     | monthly      | 23 | 69.7%            | 14 | 45.2% | 37 | 57.8%           | 0.1   |
|           | 1 time/week  | 8  | 24.2%            | 9  | 29.0% | 17 | 26.6%           |       |
|           | 3 times/week | 0  | 0.0%             | 1  | 3.2%  | 1  | 1.6%            |       |
|           | never        | 1  | 3.0%             | 0  | 0.0%  | 1  | 1.5%            |       |
|           | monthly      | 7  | 21.2%            | 1  | 3.1%  | 8  | 12.3%           |       |
| Red Meat  | 1 time/week  | 12 | 36.4%            | 7  | 21.9% | 19 | 29.2%           | 0.04  |
|           | 3 times/week | 11 | 33.3%            | 20 | 62.5% | 31 | 47.7%           |       |

|                |              |    |       |    |       |    |       |      |
|----------------|--------------|----|-------|----|-------|----|-------|------|
|                | Daily        | 2  | 6.1%  | 4  | 12.5% | 6  | 9.2%  |      |
|                | never        | 3  | 9.1%  | 7  | 21.9% | 10 | 15.4% |      |
|                | monthly      | 11 | 33.3% | 1  | 3.1%  | 12 | 18.5% |      |
| Fortified food | 1 time/week  | 6  | 18.2% | 8  | 25.0% | 14 | 21.5% | 0.03 |
|                | 3 times/week | 4  | 12.1% | 6  | 18.8% | 10 | 15.4% |      |
|                | Daily        | 9  | 27.3% | 10 | 31.2% | 19 | 29.2% |      |

184

185 Results of this present study showed that egg-yolk consumption in both groups were  
 186 almost the same (51.5% versus 53.1%, 3 times/week, 3% versus 3.1% monthly, 15.2%  
 187 versus 18.8% daily).

188 While, the statistical analysis of oily-fish consumption showed that non-Saudi population  
 189 consumed more significantly than Saudi population did. There was not much difference  
 190 between the two groups regarding liver intake, but the ingestion of both red meat and  
 191 fortified food were significantly lower among the Saudi population compared with the  
 192 non-Saudi.

193

194 **Table 3. Duration and pattern of sun-light exposure**

|                                                      | Saudi (n=33)     |    | Non-Saudi (n=32) |    | Total |    | <i>p</i> -value |     |
|------------------------------------------------------|------------------|----|------------------|----|-------|----|-----------------|-----|
|                                                      | No.              | %  | No.              | %  | No.   | %  |                 |     |
| Duration Of<br>Approximately<br>Sunlight<br>Exposure | 15 min           | 17 | 51.5%            | 11 | 34.4% | 28 | 43.1%           | 0.5 |
|                                                      | 30 min           | 9  | 27.3%            | 11 | 34.4% | 20 | 30.8%           |     |
|                                                      | 60 min           | 6  | 18.2%            | 8  | 25.0% | 14 | 21.5%           |     |
|                                                      | More Than 1 hour | 1  | 3.0%             | 2  | 6.2%  | 3  | 4.6%            |     |
|                                                      | Yes              | 1  | 3.0%             | 1  | 3.1%  | 2  | 3.1%            |     |

195

196 In the Saudi nationality group, it was observed that 27.3% were exposed to sunlight 15  
 197 minutes daily compared to 34.4% in the non-Saudi group, while 18.2% of the Saudi



198 nationality group were exposed to the sunlight 60 minutes daily versus 25% in the non-  
199 Saudi group.

200 Noteworthy, the positive exposure to sunlight in this study was defined as; the direct  
201 exposure (not indoors via windows) of at least some uncovered body parts, such as the  
202 arms and some parts of the legs, during the time period between 10 AM and 3 PM for not  
203 less than five minutes.

204

205 The occupation status was found to be positively correlated with vitamin D deficiency,  
206 while the consumption of liver was observed to be negatively correlated with vitamin D  
207 deficiency among the Saudi population, as revealed by logistic regression.

208

### 209 *Vitamin D levels*

210 **Figure 2. Box and whisker plots showing Vitamin D levels**

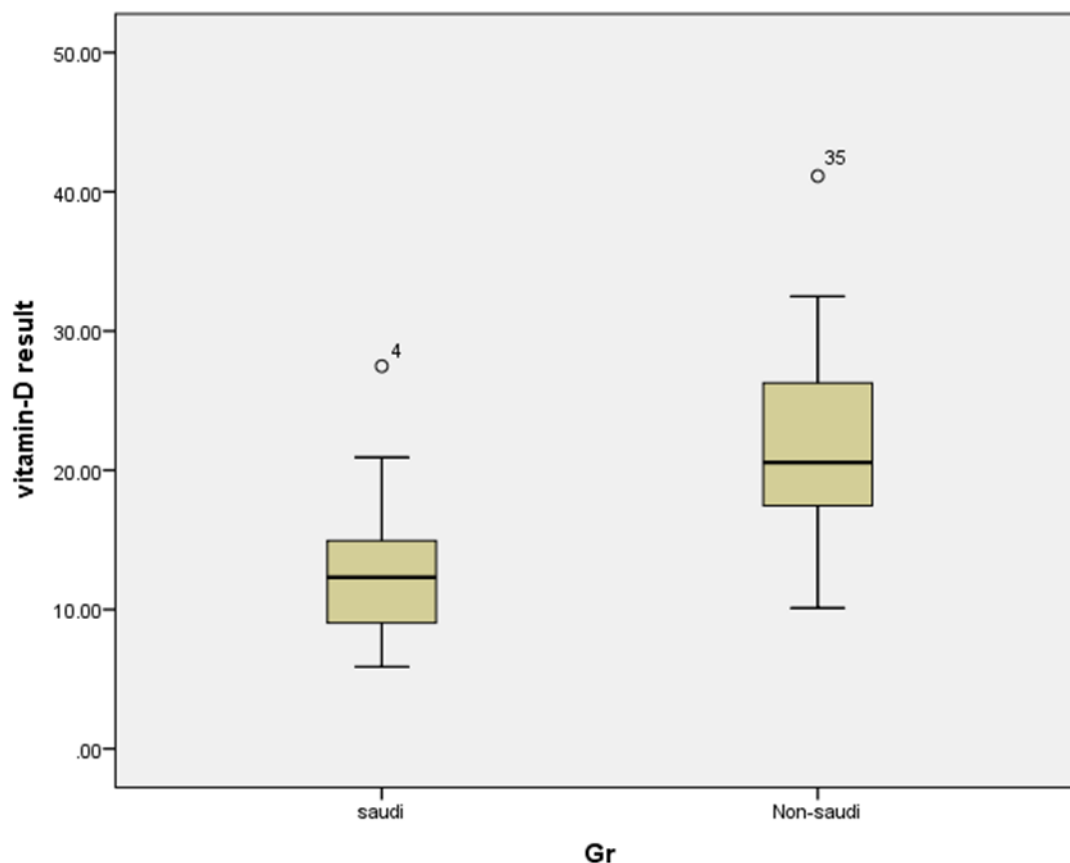

211

212 Significant percentage of the participants in the Saudi group (n=30, 91%) suffered from  
213 deficiency in vitamin D levels [25 (OH) D < 20 ng/ml]  $12.57 \pm 4.82$  (mean  $\pm$  SD),  
214 compared to only 47% (n=15) in the non-Saudi group [ $21.56 \pm 6.82$  (mean  $\pm$  SD)].

215 Vitamin D deficiency was found to be significantly higher in the Saudi group than the  
216 non-Saudi group with  $P = 0.001$

217

218

## 219 **Discussion**

### 220 **Anthropometric Features and Socio-demographic data**

#### 221 *Age of the participants*

222 In this study, the ages of the Saudis were  $33.63 \pm 7.17$  years (mean  $\pm$  SD) with median and  
223 mode of 32 years. Meanwhile, the ages of the non-Saudis were  $46.78 \pm 8.1$  years (mean  $\pm$   
224 SD), with median 45.5 and mode 43 years. Noticeably, the non-Saudis were in higher age  
225 group than the Saudi population in phase one of this study. That seemed reasonable  
226 because the majority of the non-Saudis (93.85%,  $n = 30$ ) had postgraduate degrees; this  
227 process took a long time – around six to eight years after graduation. In addition, the main  
228 reason for the presence of the non-Saudis in KSA is for work, which they would not have  
229 been eligible for without at least three years of experience. All these justified why the non-  
230 Saudis were found to be in a higher age group than the Saudis.

231 On the contrary, the majority of the Saudi participants were without postgraduate degrees.  
232 All of them were local and working in their own country, which made it easier for them to  
233 be offered jobs in a short time just after graduation. In addition, most of the Saudi  
234 participants were administrative employees, for which postgraduate studies were not a  
235 must, so opportunities for governmental jobs were easy in their country. So, the ages of  
236 the Saudis were less than that of the non-Saudis.

237 This finding was consistent with that of Naugler et al. (2013) who observed that vitamin D  
238 deficiency was less prevalent in the older age group (19). However more than one study  
239 has demonstrated the high prevalence of vitamin D deficiency in different age groups  
240 among the Saudi population (20–22). The documented high prevalence of vitamin D  
241 deficiency among the Saudi population with wide age groups was mainly the result of the  
242 recent huge socioeconomic change that led to urbanization of lifestyles and westernization  
243 of dietary habits of most of the Saudi population.

#### 244 *BMI of participants*

245 The BMI of the Saudis was  $28.85 \pm 4.55$  (mean  $\pm$  SD), while that of the non-Saudis was  
246  $27.3 \pm 3.27$  (mean  $\pm$  SD). No statistical difference was detected between the two groups.  
247 The present study has shown that the Saudi population was characterized by higher BMI.  
248 Alqarni (2016) showed in a qualitative review an increasing pattern in the overweight and  
249 obesity prevalence in Saudi Arabia, which was expected to further increase in the future.  
250 Unbalanced diets – high consumption of carbohydrates in the form of rice, bread, pizza  
251 and dates with low vegetables and fruit intake –, in addition to the lack of physical

252 exercise, contributed to the higher BMI and overweight status of the Saudi population  
253 (23–25).

254 In agreement with this finding, AlHumaidi, Adha, and Dewish in 2013 reported that obese  
255 Saudis with BMI  $32.6 \pm 6.7$  (mean + SD) were found to have very low vitamin D levels  
256 ( $11.1 \pm 5.9$  ng/mL). Similarly, Al-Daghri et al. (2016) showed that overweight participants  
257 with BMI  $28.0 \pm 6.6$  suffered from either vitamin D insufficiency (51.5%) or deficiency  
258 (29.9%) (26,27).

259 Also, the Saudi group had a greater deficiency in vitamin D than the non-Saudis. High  
260 BMI or obesity and vitamin D deficiency in this research was consistent with other  
261 researches that have evaluated the link between obesity and vitamin D status in different  
262 populations.

263 Bettencourt et al. (2018) performed a research in Portugal to assess the vitamin D status  
264 and its related factors. Their results showed that vitamin D levels were negatively  
265 correlated with obesity (i.e. BMI). This was mainly because of the sequestration of  
266 vitamin D in the body fat compartment, which could lead to the reduction of the  
267 bioavailability of vitamin D that was either photosynthesized through the skin by direct  
268 exposure to sunlight or from dietary sources (28). Other researchers have revealed the  
269 correlation of obesity with hypovitaminosis D with enhanced catabolism of the said  
270 vitamin in fat tissues and their conversion into inactive metabolites (29).

271 Kaddam et al. in 2017 conducted a cross-sectional study to assess the prevalence of the  
272 aforementioned condition and its associated factors among students and employees in  
273 three regions of KSA. The authors observed that obesity was associated with vitamin D  
274 deficiency (30). Tønnesen and colleagues in (2016) observed that obese participants had  
275 the highest relative risk for vitamin D deficiency in their study (31). Vimalleswaran et al  
276 (2014) showed that for every  $1 \text{ kg/m}^2$  higher in BMI, vitamin D deficiency was increased  
277 by 1.15% (32). Furthermore, Barchetta and colleagues in 2011 found that higher vitamin  
278 D deficiency was accompanied by increasing BMI and waist circumference (33).  
279 Chakhtoura and colleagues (2018) documented in their review on the prevalence of  
280 vitamin D deficiency in the Middle East and North Africa that higher BMI was one of the  
281 predictors of reduced serum vitamin D levels (13).

282 Therefore, it is important to consider much higher doses (2.5 times) of vitamin D  
283 supplementation in the obese vitamin D-deficient individuals due to their reduced  
284 bioavailability of vitamin D and/or the enhanced catabolism of vitamin D, as well as their  
285 conversion into inactive metabolites (1,18).

### 286 ***Marital status***

287 The results of phase one in the present study have shown that all of the non-Saudi group  
288 and most of (75.8%,  $n = 25$ ) the Saudi group were married ( $P = 0.003$ ). As described  
289 before, the non-Saudi participants were of the higher age group than the Saudi

290 participants. So, not surprisingly, the percentage of married non-Saudis was higher than  
291 that of the Saudis.

292 This finding could point towards the impact of marital status and social stability on the  
293 type of food, which might be healthier and containing a higher content of vitamin D. On  
294 the contrary, the unmarried individuals usually consume more fast and junk food that  
295 contained very small amounts of the vitamin.

### 296 *Education status*

297 The results have showed that the education status of the non-Saudi group was significantly  
298 higher than that of the Saudi group, where 93.85% (n = 30) of the non-Saudis had  
299 postgraduate degrees as compared to only 12.1% (n = 4) in the Saudi group ( $P = 0.001$ ).  
300 This is because the administrative professions were restricted to the local residents (Saudi  
301 nationality) in KSA while the academic professions were mostly occupied by non-Saudis.

302 It is elicited in this present study that participants with higher education levels had higher  
303 vitamin D levels. The same observation was seen in a number of previous studies. In the  
304 Emirates, Bani-Issa and colleagues performed a quantitative cross-sectional study in 2017  
305 to assess vitamin D deficiency and the factors associated with this condition. The authors  
306 have concluded that the less-educated, employed Emirati participants had a significantly  
307 higher percentage of vitamin D deficiency than the higher-educated participants (12).

308 In Alberta, Canada, an ecological study has been conducted by Naugler et al. (2013) to  
309 evaluate the association between vitamin D deficiency and a number of socio-  
310 demographic factors. The authors have observed that vitamin D level was associated with  
311 education status, and they attributed their finding to the increased consumption of vitamin  
312 D supplements by the higher-educated individuals (19).

313 Moreover, Ardawi and colleagues in 2012 studied the high prevalence of vitamin D  
314 deficiency among the Saudi males. The authors attributed the significant deficiency in  
315 vitamin D among Saudis to a number of factors, among which was the lack of education  
316 (34). Similarly, a Finnish study performed by Jääskeläinen et al. (2012), has documented  
317 the association between vitamin D levels with the education status (35). Furthermore, in  
318 China, Song et al. (2013), who studied the prevalence of vitamin D deficiency in pregnant  
319 women, have observed that the long duration of sunlight exposure, and the subsequently  
320 alleviation of vitamin D deficiency was in favour of the higher-educated women (36).

321 Notably, high education level rendered the individuals to be more knowledgeable and  
322 have greater awareness of at least the basic role of vitamin D in body-functioning and the  
323 negative impact of its deficiency.

### 324 *Smoking status*

325 There was a significant variation in the smoking status between the two groups with  $P =$   
326 0.001, whereby 17 out of 33 (51.5%) from the Saudi group were current smokers, while  
327 only 1 out of 32 (3.1%) from the non-Saudi was a current smoker.

328 According to Al-Nozha and colleagues, smoking rates were high among Saudis who were  
329 living in urban areas (Al-Nozha et al., 2009). This was consistent with the finding of this  
330 present study, as Al-Madinah is one of the urban cities in KSA.

331 (37).

332 Smoking status of the Saudi population could help explain the deficiency in vitamin D  
333 levels detected in this population. Chakhtoura and colleagues, in their systematic review in  
334 2018, have reviewed trials that studied the vitamin D deficiency in the MENA region.  
335 They indicated that smoking status was one of the possible consistent predictors of  
336 vitamin D deficiency (13).

337 In addition, several studies that have been conducted in different countries and used  
338 different methodologies indicated similar findings regarding the link between smoking  
339 status and vitamin D levels (38–40).

340 Hoteit et al. (2014) who studied the prevalence of vitamin D deficiency in 9147 Lebanese  
341 subjects reported smoking status was a robust predictor of vitamin D deficiency (38).  
342 Jiang et al. (2016), via a cross-sectional study that was performed in China, observed that  
343 the current smokers were associated with more severe vitamin D deficiency than non-  
344 smokers (39). In addition, Tønnesen et al. (2016) considered smoking as one of the  
345 modifiable factors for vitamin D deficiency as they showed that smoker participants were  
346 associated with a higher relative risk of vitamin D deficiency than non-smokers (31).

347 Furthermore, in 2014, Mulligan and colleagues have assessed the impact of current  
348 smoking on vitamin D-serum levels. Their results showed that smoking caused a  
349 significant reduction in vitamin D serum levels (40). Ardawi and colleagues (2012)  
350 reported a high prevalence of vitamin D deficiency (87.8%) among Saudis living in  
351 Jeddah. The authors have shown that smoking was one of the attributable factors and was  
352 associated with the low vitamin D status found in the Saudi population (34). Notably, Brot  
353 and colleagues (1999) have conducted a cross-sectional study to investigate the effects of  
354 smoking on the levels of vitamin D and calcium metabolism. The authors have observed  
355 that smoking adversely affected calcium and vitamin D metabolism, mainly by depressing  
356 vitamin D-parathyroid hormone pathway (41).

357 Not surprisingly, that the results of all these studies were in agreement with this present  
358 finding regarding the link between smoking and low vitamin D levels, as it has been  
359 documented that smoking negatively affected various body functions, harmed organs, and  
360 had a lot of general adverse consequences throughout all the body (42).

### 361 ***Occupation status***

362 There was no significant difference in the occupation status between the two groups ( $P =$   
363 0.60), as 93.9% ( $n = 31$ ) from the Saudi group and 90.6% ( $n = 29$ ) from the non-Saudi  
364 group were governmental employees. The participants in the two groups were employees  
365 in Taibah Univeristy, which is a governmental university in Al-Madinah Al-Munawarah.

366 Being office-bound employees had a negative impact on their lifestyle, rendering them to  
367 have more sedentary lifestyles and decrease their exposure to sunlight – which is the  
368 major source for the photosynthesis of vitamin D. Tønnesen et al. (2016) have  
369 documented that the more the time spent in physical exercise, the more reduction in the  
370 relative risk of vitamin D deficiency. The authors have also added that fast food  
371 consumption was associated with a high relative risk of vitamin D deficiency (31).  
372 Furthermore, Dabbour and colleagues performed a research in Makkah region in Saudi  
373 Arabia in 2016 to evaluate the association of vitamin D deficiency with T2DM. The  
374 authors have observed that vitamin D deficiency – which is highly prevalent in KSA – was  
375 associated with the lack of physical activity and decreased exposure to sunlight. They  
376 further added that physical activity could aid in the maintenance of vitamin D levels,  
377 hence concluding that duration of physical activity was positively correlated with serum  
378 vitamin D levels (4).

### 379 **Dietary habits of participants**

380 Detection of dietary habits of the Saudi population could be considered as a very  
381 important point, because there is still scarcity in the information on vitamin D status and  
382 its association with the Saudi population's dietary habits. Such information can help  
383 ministries in charge (e.g. ministry of health, ministry of education, and ministry of media)  
384 guide the Saudi population to overcome this medical problem (i.e. hypovitaminosis D),  
385 either by guiding the general population to increase exposure to sunlight or by focusing on  
386 the fortification of food products (43). The answers to these two points have been  
387 mentioned by this present study. Such valuable information could significantly help  
388 develop a guideline for the Saudi population.

389 The dietary habits between the two groups were found to be as follows:

390 **Oily fish:** the consumption of oily-fish was significantly higher in the non-Saudi group  
391 than in the Saudi group ( $P = 0.004$ ).

392 Salmon reportedly contains 988 IU of vitamin D per 100 grams; this amount accounts for  
393 about 247% of the Reference Daily Intake (RDI) of vitamin D. Herring and sardines: the  
394 fresh Atlantic herring contains around 1628 IU of vitamin D per 100-grams; this amount  
395 accounts for around 4 times the RDI. Pickled herring contains about 680 IU/100 g that  
396 accounts for 170% of RDI. Sardines provide 272 IU per serving. Mackerel provides 360  
397 IU/serving. In addition, cod liver oil is a good source of our concerned vitamin as it  
398 contains around 450 IU/teaspoon. Furthermore, canned tuna provides up to 236 IU/100 g  
399 (44).

400 Oily fish contains omega-3 fatty acids which have a well-known protective effect against  
401 dyslipidemia, hypertension, stroke, and cardiovascular diseases, in addition to the fair  
402 contents of protein, vitamins, and other essential nutrients for good health (Burger et al.,  
403 2014). The consumption of oily fish by the Saudi community remained poor. This could  
404 have been due to cultural and traditional reasons as the main food types in Saudi Arabia  
405 are mainly rich in carbohydrates and fibers like rice, potatoes, bread, and dates. In

406 addition, of the diet types and habits have increasingly westernized in the last few years  
407 due to the introduction of multi-national restaurants in the Saudi market. Furthermore, the  
408 lack of health and nutritional education played a crucial role in the dietary habits of the  
409 Saudi population. These observations were consistent with those of Burger et al. (2014)  
410 who have studied the behaviour and rates of fish consumption among the natives and non-  
411 natives living in KSA. The authors have shown that the percentage of the male Saudis  
412 who consumed fish was 3.7% and that of the male non-Saudis was 6.6% (45). Kaddam et  
413 al. in 2017 conducted a cross-sectional study to assess the occurrence of hypovitaminosis  
414 D among students and employees in three regions of KSA and its causative factors. The  
415 authors observed that lack of omega-3 in the diet of the students was associated with  
416 vitamin D deficiency (30).

417 **Red meat:** the non-Saudi group consumed red meat significantly more than the Saudi  
418 group ( $P = 0.04$ ), as 62.5% ( $n = 20$ ) of the non- Saudis consumed red meat three times  
419 weekly, and 12.5% ( $n = 4$ ) ingested red meat on a daily basis, as compared to 33.3% ( $n =$   
420 11) and 6.1% ( $n = 2$ ) of the Saudi group who consumed red meat in the same pattern.

421 A study has documented the levels of vitamin D<sub>3</sub> in types of meat, which were found to be  
422 9.0 µg/kg for beef, 1.0–23.0 µg/kg for pork, 1.0–61.0 µg/kg for lamb, 0.0–50.0 µg/kg for  
423 veal, 0.0–14.0 µg/kg for poultry, and 0.0–23.0 µg/kg for various meat product (46).

424 As mentioned before, the inherited traditional dietary habits in the Saudi community led  
425 them to prefer foods that were rich in carbohydrates and fibre, and low in fats and  
426 cholesterol. Moreover, the socioeconomic conditions, which have changed in the last  
427 decade in Saudi Arabia, caused the migration of significantly large proportions of the  
428 Saudi population from the rural areas to settle in the urban and large cities. It has been  
429 forecasted by the Ministry of Municipal and Rural Affairs (MMRA) that by the year 2025,  
430 88% of KSA residents will settle in the urban areas (47). Hence, the modification and  
431 urbanization of their lifestyles have led to the alarming increase in the consumption of fast  
432 and junk foods such as pizzas, pastas, and sandwiches. This explained the Saudis' low  
433 consumption of red meat.

434 This present study's finding was consistent with a nationally representative survey done in  
435 2016 by Moradi-Lakeh and colleagues to evaluate the dietary habits in KSA. The authors  
436 have discovered that the type of food least consumed by the Saudi population was red  
437 meat;  $4.8 \pm 0.2$  g (mean  $\pm$  SE). They added that only a small proportion of the Saudis met  
438 the dietary recommendations (48).

439 **Fortified food:** Although, fortified food may be considered as the ideal and the easiest  
440 alternative to sunlight exposure in the Saudi lifestyle to guard against vitamin D  
441 deficiency, yet the consumption of fortified food was significantly higher in the non-Saudi  
442 group than in the Saudi group ( $P = 0.03$ ).

443 The known sources of fortified food are cow's milk which usually contains around 130 IU  
444 vitamin D/cup (237 ml), soy milk which can contain up to 119 IU vitamin D/cup, orange  
445 juice which can also be fortified with vitamin D (usually 142 IU/cup), and cereal and

446 oatmeal which can be fortified with about 154 IU vitamin D per serving (49). This finding  
447 is consistent with two recent studies which were conducted in Saudi Arabia. Al-Daghri  
448 (2015) has studied the correlation between vitamin D levels and the consumption of dairy  
449 and fortified products in Saudi Arabia. The author has observed the poor consumption of  
450 fortified and dairy products in the overall Saudi population, apart from showed that the  
451 vitamin D status was significantly associated with the consumption of dairy and fortified  
452 products (20). In addition, in 2012, Ardawi and colleagues considered poor consumption  
453 of dietary and fortified products as one of the contributory factors to vitamin D deficiency  
454 in the Saudi population (34).

455 **Egg-yolk:** in contrast, there was no significant difference between the two groups in the  
456 consumption of egg-yolk ( $P = 0.9$ ). Only a small proportion of the two groups ate egg-  
457 yolk as per the dietary recommendations. This could be justified by the dramatic  
458 socioeconomic change and hence, urbanization of lifestyle and westernization of food  
459 habits which pointed towards the large consumption of fast-food. Egg-yolk in general is  
460 rich in fats, vitamins, and minerals. Egg-yolk contains around 39 IU of vitamin D, while  
461 egg-yolk which comes from chickens that spent more time under the sun produced 3 to 4  
462 times higher vitamin D. Chickens fed with vitamin D-enriched feed produced egg-yolks  
463 with around 6000 IU vitamin D (49).

464 **Liver consumption** did not vary significantly between the two groups ( $P = 0.1$ ). Even  
465 though liver is considered as one of the rich animal sources of vitamin D that reaches as  
466 high as 140  $\mu\text{g}/\text{kg}$ , the consumption of liver was quite poor in both groups (46).

467 **The duration of sunlight exposure** did not significantly vary between the two groups ( $P$   
468  $= 0.5$ ). As observed, both groups were poorly exposed to sunlight (18.2% from the Saudi  
469 group and 25% from the non-Saudi group were exposed to sunlight for one hour daily).

470 It was expected that 80% of the daily requirement of vitamin D in the majority of  
471 individuals would be generated through sunlight exposure, as the major source of vitamin  
472 D was photosynthesis. However, this was not the reality nowadays, presumably due to the  
473 fear of erythema and some types of skin cancer, or that the increasing use of technology in  
474 the 21<sup>st</sup> century kept most of the people spending most of their time indoors (1). In Saudi  
475 Arabia, apart from the abovementioned possible causes of the avoidance of exposure to  
476 sunlight, this could be attributed to the extreme hot temperature in KSA due to its  
477 geographical location, abundant use of cars, and the presence of more highways.

478 Consistently with our results, Ardawi and colleagues in 2012 assessed the vitamin D  
479 deficiency prevalence among healthy Saudi males. They have observed the high and  
480 significant prevalence of vitamin D deficiency in this population was because of a number  
481 of factors, among which included poor sunlight exposure (34). Almeahdi et al. (2016)  
482 studied the vitamin D levels among children in Jeddah, KSA. Their result – poor sunlight  
483 exposure in Saudi Arabia – was consistent with the finding of this present study (50). The  
484 discrepancy between both studies was in the study population, where this present research  
485 focused on adults and not children.



## 486 **Vitamin D levels among Saudi and non-Saudi populations**

487 In phase one, 30 out of 33 participants in the Saudi group (91%) were vitamin D-deficient  
488 (calcidiol levels < 20 ng/ml) as compared to 15 out of 32 participants (47%) in the non-  
489 Saudi population. Subsequently, vitamin D deficiency was found to be significantly higher  
490 in the Saudis ( $12.57 \pm 4.82$ ) (mean  $\pm$  SD) than the non-Saudis ( $21.56 \pm 6.82$ ) (mean  $\pm$  SD),  
491 with  $P = 0.001$ .

492 In terms of the socio-demographic data, occupation status was positively correlated with  
493 the vitamin D deficiency in the Saudi group and was shown to be the only predictor of  
494 vitamin D deficiency, as revealed by logistic regression and expressed by exponential  
495 beta. This finding could be explained by the fact that the majority of the Saudi population  
496 in this present study were governmental employees, which rendered them more office-  
497 bound, and consequently reducing their duration and the time of sunlight exposure (51).  
498 Among the dietary habits, the logistic regression analysis revealed that the consumption of  
499 liver was negatively correlated with vitamin D deficiency and was considered as a  
500 predictor of vitamin D deficiency.

501 Previously, there was a controversy regarding the exact level of vitamin D which could be  
502 considered as deficiency or even insufficiency. In the renal and extra-renal tissues, the  
503 enzyme 1 $\alpha$ -hydroxylase (CYP27B1) targets its substrate calcidiol and converts it into the  
504 active form, calcitriol. It has been documented that not more than 50% of maximal 25-  
505 (OH) D-1  $\alpha$ -hydroxylase activity (Km) was reached when 25-(OH) D level reached 40  
506 ng/mL (100 nmol/L), which in turn relied on having adequate amounts of vitamin D (18).  
507 On the kinetics of 25-(OH) D-1  $\alpha$ -hydroxylase, the most recent studies were consistent  
508 with the USA Endocrine Society's recommendations that the targeted level for optimal  
509 vitamin D effects was 30–50 ng/mL (75–125 nmol/L), preferably achieving the level of  
510 40–60 ng/mL (100–150 nmol/L). Meanwhile, vitamin D deficiency was denoted by serum  
511 vitamin D levels of < 20 ng/mL (< 50 nmol/L), and insufficient or suboptimal status 20–  
512 30 ng/mL (50–75 nmol/L) (18,52,53).

513 Notably, 13 out of 33 Saudi non-diabetics were overweight (BMI > 25), and 5 out of 33  
514 were obese (BMI > 30). So, it was observed from the finding of present study that both  
515 conditions – overweight and vitamin D deficiency – were higher in the Saudi population.  
516 Furthermore, it is well known that T2DM became an increasingly widespread chronic  
517 disease in the Saudi community (as mentioned in the Introduction Chapter). Thus,  
518 overweight or obesity and vitamin D deficiency may be considered indicators or  
519 predictors for the development of T2DM among the Saudi population. Likewise, Bani-Issa  
520 and colleagues (2017) have observed obesity and T2DM to be bivariate correlators (which  
521 were independent of each other) with vitamin D deficiency in Emiratis (12). In addition,  
522 Sadiya et al. (2014) documented in their cross-sectional study which was performed in  
523 UAE the coexistence of these three cofactors – obesity, vitamin D deficiency and T2DM  
524 (54). Therefore, the present study recommends early screening and detection of T2DM in  
525 the presence of obesity and vitamin D deficiency, with rapid and aggressive corrections of  
526 these two predisposing factors.

527 As long as vitamin D deficiency is highly prevalent in the Saudi population relative to the  
528 non-Saudis, there might be some genetic factors playing a role in this scenario. Al Kadi  
529 and Sonbol studied the high prevalence of vitamin D deficiency among Saudi population  
530 in 2015. They have stated that the increased rate of consanguineous marriages in the Saudi  
531 population have led to some types of genetic mutations, such as calcium-sensing receptor  
532 gene A986S polymorphisms (55). In addition, Sonbol and colleagues have reported the  
533 association between low levels of vitamin D and the ‘‘S’’ of the calcium-sensing receptor  
534 gene (56).

535 Furthermore, in 2016, Nayak and Ramnanansingh in their study which investigated the  
536 deficiency of vitamin D among the Trinidadian population have attributed this deficiency  
537 to VDR genetic polymorphism. This polymorphism might lead to the dimensional  
538 conformation of the vitamin D receptors which showed variations in their affinities  
539 towards vitamin D (57). This hypothesis gave rise to the need for other studies to confirm  
540 this hypothesis. A possible explanation for the rampant hypovitaminosis D among Saudis  
541 could have been due to the dark skin, which could reduce the Ultraviolet B (UVB) rays’  
542 penetration into the skin, thus minimizing the synthesis of vitamin D (58).

543 However, all the various factors that have been discussed previously in this study or in  
544 other studies (poor consumption of vitamin D-containing food, skin pigmentation, sunlight  
545 exposure, obesity, smoking, interacting drugs, etc.) which are implicated in the incidence  
546 of vitamin D deficiency could lead to a decrease in the synthesis and bioavailability, and  
547 elevations in catabolism and urinary excretion of vitamin D (1,59).

548 In addition, the cultural clothes used by the male Saudi population which covered the  
549 whole body (even their heads and necks) reduced their body surface exposure to sunlight.  
550 Consequently, their cutaneous vitamin D synthesis was decreased.

551 The findings explored in this current study were consistent with one systematic review and  
552 six studies conducted in different regions in Saudi Arabia. However, to our best  
553 knowledge until now our study was the first to compare the prevalence of vitamin D  
554 deficiency between the Saudi population and participants from other nationalities living in  
555 the same environment. In addition, it was the first to assess the prevalence of vitamin D  
556 deficiency in Al-Madinah Al-Munawarah region.

557 The systematic review and a meta-analysis was performed by Al-Dagrhi and published in  
558 2018. The author has reviewed the literature for the most recent epidemiological clinical  
559 trials that studied the prevalence of hypovitaminosis D in the Saudi population from 2011  
560 till 2016. He included 13 local trials (performed in KSA), in which 24 399 healthy Saudi  
561 participants were included. This systematic review-cum-meta-analysis has shown that  
562 81.0% of the Saudi population were deficient in this micronutrient, and that the deficiency  
563 in vitamin D in the Saudi population was accompanied with several diseases, among  
564 which were asthma, cancer, cardiac diseases, chronic kidney disease, obesity, metabolic  
565 syndrome, type 1 diabetes, type 2 diabetes, and skeletal effects. The author has concluded

566 in line with our results in which there were widespread hypovitaminosis D that was  
567 associated with insulin resistance and related comorbidities in the Saudi populations (43).

568 Mogahed (2018) has conducted a study in Riyadh city among 100 Saudi patients to detect  
569 their vitamin D status. The results showed that 80% of the participants suffered from  
570 vitamin D deficiency (< 20 ng/ml). The author has concluded that prevalence of vitamin D  
571 deficiency in the Saudi population was very high (60).

572 Dabbour et al. performed a case-control study on 200 participants in Makkah Region in  
573 Saudi Arabia in 2016 to evaluate the levels of vitamin D and to assess the associated  
574 factors in healthy and diabetic Saudi participants. This study has concluded that there was  
575 a very significant deficiency in vitamin D among the healthy and diabetic Saudi  
576 populations (4).

577 However, this present trial differed from Dabbour et al. (2016) and Mogahed (2018) in the  
578 checking and comparison of vitamin D levels among Saudi and non-Saudi population, and  
579 in the evaluation of the dietary habits of the participants in an attempt to assess their  
580 correlations with vitamin D deficiency.

581 A retrospective study has been conducted by Alfawaz et al. in Riyadh city to determine  
582 the prevalence of vitamin D deficiency and its association with cardiovascular disease and  
583 other factors in the Saudi population. Their results have showed that the overall  
584 prevalence of vitamin D deficiency in their study was 78.1% in Saudi females and 72.4%  
585 in Saudi males. Moreover, the prevalence of vitamin D deficiency was associated with  
586 age, and obesity, and positively correlated with calcium, albumin, and phosphorus. It was  
587 negatively correlated with alkaline phosphatase and PTH levels (16). This present study  
588 showed a higher prevalence of vitamin D deficiency among the Saudi population in Al-  
589 Madinah Al-Munawarah (91%) than what was reported by Alfawaz et al. (2014) in  
590 Riyadh (72.4.1% in males). Furthermore, this present study has not only detected the  
591 prevalence of vitamin D deficiency among the Saudi population, but also compared the  
592 high prevalence with those of the non-Saudi population living in the same environment via  
593 a prospective study design.

594 A multi-centered case-control study has been done by Alhumaidi and colleagues in the  
595 Southern Region of Saudi Arabia (mainly Khamis Mushyt and Abha) in 2013. Their aim  
596 was to assess the vitamin D status among the Saudi population. They have included 172  
597 diabetic Saudi patients and 173 non-diabetic Saudi participants in their trial. They have  
598 showed a very significant vitamin D deficiency in the healthy and diabetic Saudi  
599 population (98.5%). The authors have suggested the need for larger studies for better  
600 detection of vitamin D deficiency in the Saudi population as a whole, especially among  
601 the diabetic patients (26). The lifestyle, socio-demographic data and dietary patterns of  
602 their study population have not been studied by Alhumaidi and colleagues, in contrast to  
603 this present study. In addition, participants with thyroid diseases were included in their  
604 study; 23.5% were found to have euthyroid multinodular goiter and 33.8% were with  
605 hypothyroidism. These could have influenced their results (61). Furthermore, 17.4% of the

606 non-diabetic Saudi participants were lost to follow-up. In the contrary, this present study  
607 has excluded participants with any thyroid and parathyroid disease and the compliance  
608 with the study protocol in this particular phase was 100%.

609 Also, a study has been done in Saudi Arabia in 2012 by Ardawi et al. This study design  
610 was cross-sectional and was aimed to assess the prevalence of deficiency in vitamin D in  
611 Saudi men in Jeddah. The authors have concluded that the deficiency in vitamin D was  
612 highly prevalent (87.8%) among Saudi men living in Jeddah (62). Although this present  
613 study was similar to that of Ardawi et al. (2012) in detecting the prevalence of vitamin D  
614 deficiency in only males and both have reported the high prevalence of vitamin D  
615 deficiency in Saudi men. Ardawi and colleagues neither compared this high prevalence in  
616 Saudi men with other nationalities residing in the same environment, nor evaluated the  
617 association of socio-demographic factors, sunlight exposure, and dietary habits with the  
618 high prevalence of vitamin D deficiency in the Saudi and non-Saudi population.

619

620 In Norway, a study has been performed in 2013 to compare the serum vitamin D levels  
621 among different populations living in Norway. The results of this study have revealed that  
622 immigrants from South Asia, the Middle East, and Africa were found to be more vitamin  
623 D-deficient (25-(OH) D < 20 ng/mL) than East Asians (63). Notably, the authors have  
624 recommended the routine measurement of vitamin D levels and early detection of vitamin  
625 D deficiency in these populations (Middle East and Africa).

626

## 627 **Conclusion**

628 Vitamin D deficiency was significantly higher in the Saudi population than the non-Saudis  
629 population. The occupation status was found to be the only factor positively correlated  
630 with vitamin D deficiency.

631 Early screening for vitamin D serum-level is recommended for the Saudi population and  
632 rapid correction of vitamin D deficiency with vitamin D supplements should be  
633 considered.

634

## 635 **Limitations**

636 Multi-centred study might have provided more generalizable results.

637

638

639

640

641 Acknowledgments: We would like to thank Dr Sherif Monir for his advice on statistical  
642 analysis, Dr AbdelMannan Aman for the assessment of participants invited to this study  
643 all the laboratory staff for their help with the data collection.

644

645

646

## 647 **References**

- 648 1. Wimalawansa SJ. Associations of vitamin D with insulin resistance, obesity, type 2  
649 diabetes, and metabolic syndrome. *J Steroid Biochem Mol Biol* [Internet]. 2018 Jan  
650 [cited 2018 Oct 1];175:177–89. Available from:  
651 <http://www.ncbi.nlm.nih.gov/pubmed/27662816>
- 652 2. Haq A, Wimalawansa SJ, Pludowski P, Anouti F Al. Clinical practice guidelines  
653 for vitamin D in the United Arab Emirates. *J Steroid Biochem Mol Biol* [Internet].  
654 2018 Jan [cited 2018 Oct 2];175:4–11. Available from:  
655 <http://www.ncbi.nlm.nih.gov/pubmed/27693095>
- 656 3. Mostafa WZ, Hegazy RA. Vitamin D and the skin: Focus on a complex  
657 relationship: A review. *J Adv Res* [Internet]. 2015 Nov [cited 2018 Oct  
658 1];6(6):793–804. Available from: <http://www.ncbi.nlm.nih.gov/pubmed/26644915>
- 659 4. Dabbour IR, Jazar AS, Azzeh FS. Vitamin D Status in Patients with Type 2  
660 Diabetes Mellitus in Makkah Region of Saudi Arabia. *Pakistan J Nutr* [Internet].  
661 2016 Mar 1 [cited 2018 Sep 30];15(3):203–10. Available from:  
662 <http://www.scialert.net/abstract/?doi=pjn.2016.203.210>
- 663 5. Palacios C, Gonzalez L. Is vitamin D deficiency a major global public health  
664 problem? Vol. 144, *Journal of Steroid Biochemistry and Molecular Biology*. 2014.
- 665 6. Bischoff-Ferrari H. Vitamin D - From Essentiality to Functionality. *Int J Vitam*  
666 *Nutr Res* [Internet]. 2012 Oct [cited 2018 Oct 1];82(5):321–6. Available from:  
667 <http://www.ncbi.nlm.nih.gov/pubmed/23798050>
- 668 7. Okazaki R. [Updates on rickets and osteomalacia: vitamin D deficiency : its  
669 pathophysiology and treatment]. *Clin Calcium* [Internet]. 2013 Oct [cited 2018 Oct  
670 2];23(10):1483–9. Available from: <http://www.ncbi.nlm.nih.gov/pubmed/24076647>
- 671 8. Wharton B, Bishop N. Rickets. *Lancet* [Internet]. 2003 Oct 25 [cited 2018 Oct  
672 1];362(9393):1389–400. Available from:  
673 <http://www.ncbi.nlm.nih.gov/pubmed/14585642>
- 674 9. Chaplin G, Jablonski NG. Vitamin D and the evolution of human depigmentation.  
675 *Am J Phys Anthropol* [Internet]. 2009 Aug [cited 2018 Oct 2];139(4):451–61.  
676 Available from: <http://www.ncbi.nlm.nih.gov/pubmed/19425101>
- 677 10. Ginde AA, Liu MC, Camargo CA. Demographic Differences and Trends of  
678 Vitamin D Insufficiency in the US Population, 1988-2004. *Arch Intern Med*

- 679 [Internet]. 2009 Mar 23 [cited 2018 Oct 2];169(6):626. Available from:  
680 <http://www.ncbi.nlm.nih.gov/pubmed/19307527>
- 681 11. Luxwolda MF, Kuipers RS, Kema IP, van der Veer E, Dijck-Brouwer DAJ,  
682 Muskiet FAJ. Vitamin D status indicators in indigenous populations in East Africa.  
683 *Eur J Nutr* [Internet]. 2013 Apr 10 [cited 2018 Oct 2];52(3):1115–25. Available  
684 from: <http://www.ncbi.nlm.nih.gov/pubmed/22878781>
- 685 12. Bani-issa W, Eldeirawi K, Harfil S, Fakhry R. Vitamin D Deficiency and Its  
686 Determinants in Adults: A Sample from Community-Based Settings in the United  
687 Arab Emirates. *Int J Endocrinol* [Internet]. 2017 Mar 2 [cited 2018 Oct 2];2017:1–  
688 7. Available from: <https://www.hindawi.com/journals/ije/2017/3906306/>
- 689 13. Chakhtoura M, Rahme M, Chamoun N, El-Hajj Fuleihan G. Vitamin D in the  
690 Middle East and North Africa. *Bone reports* [Internet]. 2018 Jun [cited 2018 Oct  
691 2];8:135–46. Available from:  
692 <https://linkinghub.elsevier.com/retrieve/pii/S2352187218300159>
- 693 14. Tuffaha M, El Bcheraoui C, Daoud F, Al Hussaini H, Alamri F, Al Saeedi M, et al.  
694 Deficiencies under plenty of sun: Vitamin D status among adults in the kingdom of  
695 Saudi Arabia, 2013. *N Am J Med Sci* [Internet]. 2015 Oct [cited 2018 Oct  
696 2];7(10):467. Available from: <http://www.ncbi.nlm.nih.gov/pubmed/26713293>
- 697 15. Ardawi M-SM, Sibiany AM, Bakhsh TM, Qari MH, Maimani AA. High prevalence  
698 of vitamin D deficiency among healthy Saudi Arabian men: relationship to bone  
699 mineral density, parathyroid hormone, bone turnover markers, and lifestyle factors.  
700 *Osteoporos Int* [Internet]. 2012 Feb 6 [cited 2018 Oct 2];23(2):675–86. Available  
701 from: <http://www.ncbi.nlm.nih.gov/pubmed/21625888>
- 702 16. Alfawaz H, Tamim H, Alharbi S, Aljaser S, Tamimi W. Vitamin D status among  
703 patients visiting a tertiary care center in Riyadh, Saudi Arabia: a retrospective  
704 review of 3475 cases. *BMC Public Health* [Internet]. 2014 Dec 13 [cited 2018 Oct  
705 2];14(1):159. Available from: <http://www.ncbi.nlm.nih.gov/pubmed/24524260>
- 706 17. Elsammak MY, Al-Wosaibi AA, Al-Howeish A, Alsaeed J. Vitamin D Deficiency  
707 in Saudi Arabs. *Horm Metab Res* [Internet]. 2010 May 8 [cited 2018 Oct  
708 2];42(05):364–8. Available from: <http://www.ncbi.nlm.nih.gov/pubmed/20213587>
- 709 18. Pludowski P, Holick MF, Grant WB, Konstantynowicz J, Mascarenhas MR, Haq A,  
710 et al. Vitamin D supplementation guidelines. *J Steroid Biochem Mol Biol*  
711 [Internet]. 2018 Jan [cited 2018 Oct 2];175:125–35. Available from:  
712 <http://www.ncbi.nlm.nih.gov/pubmed/28216084>
- 713 19. Naugler C, Zhang J, Henne D, Woods P, Hemmelgarn BR. Association of vitamin  
714 D status with socio-demographic factors in Calgary, Alberta: an ecological study  
715 using Census Canada data. *BMC Public Health* [Internet]. 2013 Dec 8 [cited 2019  
716 Feb 14];13(1):316. Available from:  
717 <http://www.ncbi.nlm.nih.gov/pubmed/23566290>
- 718 20. Al-Daghri NM, Al-Saleh Y, Aljohani N, Alokail M, Al-Attas O, Alnaami AM, et  
719 al. Vitamin D Deficiency and Cardiometabolic Risks: A Juxtaposition of Arab

- 720 Adolescents and Adults. Devaney J, editor. PLoS One [Internet]. 2015 Jul 17 [cited  
721 2019 Feb 14];10(7):e0131315. Available from:  
722 <http://www.ncbi.nlm.nih.gov/pubmed/26186591>
- 723 21. AlBuhairan FS, Tamim H, Al Dubayee M, AlDhukair S, Al Shehri S, Tamimi W, et  
724 al. Time for an Adolescent Health Surveillance System in Saudi Arabia: Findings  
725 From “Jeeluna.” J Adolesc Heal [Internet]. 2015 Sep [cited 2019 Feb  
726 14];57(3):263–9. Available from: <http://www.ncbi.nlm.nih.gov/pubmed/26299553>
- 727 22. AlFaleh KM, Al-Manie AM, Al-Mahmoud HF, Al-Razqan HM, Al-Mutlaq AB, Al-  
728 Rumaih SA, et al. Prevalence of vitamin D deficiency in Saudi newborns at a  
729 tertiary care center. Saudi Med J [Internet]. 2014 Feb [cited 2019 Feb  
730 14];35(2):178–82. Available from: <http://www.ncbi.nlm.nih.gov/pubmed/24562518>
- 731 23. M Alqarni SS. A Review of Prevalence of Obesity in Saudi Arabia. J Obes Eat  
732 Disord [Internet]. 2016 Oct 25 [cited 2019 Feb 14];02(02). Available from:  
733 [http://obesity.imedpub.com/a-review-of-prevalence-of-obesity-in-saudi-](http://obesity.imedpub.com/a-review-of-prevalence-of-obesity-in-saudi-arabia.php?aid=17699)  
734 [arabia.php?aid=17699](http://obesity.imedpub.com/a-review-of-prevalence-of-obesity-in-saudi-arabia.php?aid=17699)
- 735 24. Alshahrani MM, Chandramohan S. A cross-sectional study on prevalence of  
736 obesity and its association with dietary habits among college students in Abha,  
737 Saudi Arabia. Int J Community Med Public Heal [Internet]. 2017 Apr 24 [cited  
738 2019 Feb 14];4(5):1406. Available from:  
739 <http://www.ijcmph.com/index.php/ijcmph/article/view/1148>
- 740 25. Alzahrani A, Al-Khaldi Y, Alsamghan A. Prevalence of obesity among Saudi board  
741 residents in Aseer Region, Saudi Arabia. Saudi J Obes [Internet]. 2016 [cited 2019  
742 Feb 14];4(1):13. Available from:  
743 <http://www.saudijobesity.com/text.asp?2016/4/1/13/184947>
- 744 26. Alhumaidi M, Agha A, Dewish M. Vitamin d deficiency in patients with type-2  
745 diabetes mellitus in southern region of saudi arabia. Maedica (Buchar) [Internet].  
746 2013 Sep [cited 2019 Feb 14];8(3):231–6. Available from:  
747 <http://www.ncbi.nlm.nih.gov/pubmed/24371490>
- 748 27. Al-Daghri NM, Aljohani NJ, Al-Attas OS, Al-Saleh Y, Alnaami AM, Sabico S, et  
749 al. Comparisons in childhood obesity and cardiometabolic risk factors among urban  
750 Saudi Arab adolescents in 2008 and 2013. Child Care Health Dev [Internet]. 2016  
751 Sep 1 [cited 2019 Feb 14];42(5):652–7. Available from:  
752 <http://doi.wiley.com/10.1111/cch.12361>
- 753 28. Bettencourt A, Boleixa D, Reis J, Oliveira JC, Mendonça D, Costa PP, et al. Serum  
754 25-hydroxyvitamin D levels in a healthy population from the North of Portugal. J  
755 Steroid Biochem Mol Biol [Internet]. 2018 Jan [cited 2019 Feb 14];175:97–101.  
756 Available from: <http://www.ncbi.nlm.nih.gov/pubmed/27825978>
- 757 29. Karonova T, Grineva E, Belyaeva O, Bystrova A, Jude EB, Andreeva A, et al.  
758 Relationship Between Vitamin D Status and Vitamin D Receptor Gene  
759 Polymorphisms With Markers of Metabolic Syndrome Among Adults. Front  
760 Endocrinol (Lausanne) [Internet]. 2018 [cited 2019 Feb 14];9:448. Available from:

- 761 <http://www.ncbi.nlm.nih.gov/pubmed/30166978>
- 762 30. Kaddam IM, Al-Shaikh AM, Abaalkhail BA, Asseri KS, Al-Saleh YM, Al-Qarni  
763 AA, et al. Prevalence of vitamin D deficiency and its associated factors in three  
764 regions of Saudi Arabia. *Saudi Med J* [Internet]. 2017 Apr 1 [cited 2019 Feb  
765 14];38(4):381–90. Available from:  
766 <https://www.smj.org.sa/index.php/smj/article/view/smj.2017.4.18753>
- 767 31. Tønnesen R, Hovind PH, Jensen LT, Schwarz P. Determinants of vitamin D status  
768 in young adults: influence of lifestyle, sociodemographic and anthropometric  
769 factors. *BMC Public Health* [Internet]. 2016 [cited 2019 Feb 14];16:385. Available  
770 from: <http://www.ncbi.nlm.nih.gov/pubmed/27170258>
- 771 32. Vimalleswaran KS, Berry DJ, Lu C, Tikkanen E, Pilz S, Hiraki LT, et al. Causal  
772 Relationship between Obesity and Vitamin D Status: Bi-Directional Mendelian  
773 Randomization Analysis of Multiple Cohorts. Minelli C, editor. *PLoS Med*  
774 [Internet]. 2013 Feb 5 [cited 2018 Sep 30];10(2):e1001383. Available from:  
775 <http://dx.plos.org/10.1371/journal.pmed.1001383>
- 776 33. Barchetta I, Angelico F, Ben M Del, Baroni MG, Pozzilli P, Morini S, et al. Strong  
777 association between non alcoholic fatty liver disease (NAFLD) and low 25(OH)  
778 vitamin D levels in an adult population with normal serum liver enzymes. *BMC*  
779 *Med* [Internet]. 2011 Dec 12 [cited 2018 Sep 30];9(1):85. Available from:  
780 <http://bmcmmedicine.biomedcentral.com/articles/10.1186/1741-7015-9-85>
- 781 34. Ardawi M-SM, Sibiany AM, Bakhsh TM, Qari MH, Maimani AA. High prevalence  
782 of vitamin D deficiency among healthy Saudi Arabian men: relationship to bone  
783 mineral density, parathyroid hormone, bone turnover markers, and lifestyle factors.  
784 *Osteoporos Int* [Internet]. 2012 Feb 6 [cited 2018 Sep 30];23(2):675–86. Available  
785 from: <http://link.springer.com/10.1007/s00198-011-1606-1>
- 786 35. Jääskeläinen T, Knekt P, Marniemi J, Sares-Jäske L, Männistö S, Heliövaara M, et  
787 al. Vitamin D status is associated with sociodemographic factors, lifestyle and  
788 metabolic health. *Eur J Nutr* [Internet]. 2013 Mar 27 [cited 2019 Feb  
789 14];52(2):513–25. Available from: <http://www.ncbi.nlm.nih.gov/pubmed/22538929>
- 790 36. Song Y, Wang L, Pittas AG, Del Gobbo LC, Zhang C, Manson JE, et al. Blood 25-  
791 Hydroxy Vitamin D Levels and Incident Type 2 Diabetes: A meta-analysis of  
792 prospective studies. *Diabetes Care* [Internet]. 2013 May 1 [cited 2019 Feb  
793 14];36(5):1422–8. Available from: <http://www.ncbi.nlm.nih.gov/pubmed/23613602>
- 794 37. Al-Nozha MM, Al-Mazrou YY, Arafah MR, Al-Maatouq MA, Khalil MZ, Khan  
795 NB, et al. Smoking in Saudi Arabia and its relation to coronary artery disease. *J*  
796 *Saudi Hear Assoc* [Internet]. 2009 Jul [cited 2019 Feb 14];21(3):169–76. Available  
797 from: <http://www.ncbi.nlm.nih.gov/pubmed/23960568>
- 798 38. Hoteit M, Al-Shaar L, Yazbeck C, Bou Sleiman M, Ghalayini T, El-Hajj Fuleihan  
799 G. Hypovitaminosis D in a sunny country: Time trends, predictors, and implications  
800 for practice guidelines. *Metabolism* [Internet]. 2014 Jul [cited 2019 Feb  
801 14];63(7):968–78. Available from:



- 802 <https://linkinghub.elsevier.com/retrieve/pii/S0026049514001176>
- 803 39. Jiang W-L, Gu H-B, Zhang Y-F, Xia Q-Q, Qi J, Chen J-C. Vitamin D  
804 Supplementation in the Treatment of Chronic Heart Failure: A Meta-analysis of  
805 Randomized Controlled Trials. *Clin Cardiol* [Internet]. 2016 Jan 1 [cited 2019 Feb  
806 14];39(1):56–61. Available from: <http://doi.wiley.com/10.1002/clc.22473>
- 807 40. Mulligan JK, Nagel W, O’Connell BP, Wentzel J, Atkinson C, Schlosser RJ.  
808 Cigarette smoke exposure is associated with vitamin D3 deficiencies in patients  
809 with chronic rhinosinusitis. *J Allergy Clin Immunol* [Internet]. 2014 Aug 1 [cited  
810 2019 Feb 14];134(2):342–9. Available from:  
811 <http://www.ncbi.nlm.nih.gov/pubmed/24698317>
- 812 41. Brot C, Jorgensen NR, Sorensen OH. The influence of smoking on vitamin D status  
813 and calcium metabolism. *Eur J Clin Nutr* [Internet]. 1999 Dec [cited 2019 Feb  
814 14];53(12):920–6. Available from: <http://www.ncbi.nlm.nih.gov/pubmed/10602348>
- 815 42. Health CO on S and. Smoking and Tobacco Use; Fact Sheet; Health Effects of  
816 Cigarette Smoking. 2018 [cited 2019 Feb 14]; Available from:  
817 [https://www.cdc.gov/tobacco/data\\_statistics/fact\\_sheets/health\\_effects/effects\\_cig\\_](https://www.cdc.gov/tobacco/data_statistics/fact_sheets/health_effects/effects_cig_smoking/index.htm)  
818 [smoking/index.htm](https://www.cdc.gov/tobacco/data_statistics/fact_sheets/health_effects/effects_cig_smoking/index.htm)
- 819 43. Al-Daghri NM. Vitamin D in Saudi Arabia: Prevalence, distribution and disease  
820 associations. Vol. 175, *Journal of Steroid Biochemistry and Molecular Biology*.  
821 2018.
- 822 44. Lu Z, Chen TC, Zhang A, Persons KS, Kohn N, Berkowitz R, et al. An evaluation  
823 of the vitamin D3 content in fish: Is the vitamin D content adequate to satisfy the  
824 dietary requirement for vitamin D? *J Steroid Biochem Mol Biol* [Internet]. 2007  
825 Mar [cited 2019 Feb 14];103(3–5):642–4. Available from:  
826 <http://www.ncbi.nlm.nih.gov/pubmed/17267210>
- 827 45. Burger J, Gochfeld M, Batang Z, Alikunhi N, Al-Jahdali R, Al-Jebreen D, et al.  
828 Fish consumption behavior and rates in native and non-native people in Saudi  
829 Arabia. *Environ Res* [Internet]. 2014 Aug [cited 2019 Feb 14];133:141–8.  
830 Available from: <http://www.ncbi.nlm.nih.gov/pubmed/24926920>
- 831 46. Schmid A, Walther B. Natural vitamin D content in animal products. *Adv Nutr*  
832 [Internet]. 2013 Jul 1 [cited 2019 Feb 14];4(4):453–62. Available from:  
833 <http://www.ncbi.nlm.nih.gov/pubmed/23858093>
- 834 47. Abdul Salam A, Elsegaey I, Khraif R, Al-Mutairi A. Population distribution and  
835 household conditions in Saudi Arabia: reflections from the 2010 Census.  
836 *Springerplus* [Internet]. 2014 Dec 16 [cited 2019 Feb 14];3(1):530. Available from:  
837 <http://www.ncbi.nlm.nih.gov/pubmed/25279321>
- 838 48. Moradi-Lakeh M, El Bcheraoui C, Tuffaha M, Daoud F, Al Saeedi M, Basulaiman  
839 M, et al. The health of Saudi youths: current challenges and future opportunities.  
840 *BMC Fam Pract* [Internet]. 2016 Dec 5 [cited 2019 Feb 14];17(1):26. Available  
841 from: <http://www.biomedcentral.com/1471-2296/17/26>

- 842 49. Jones T. 9 Healthy Foods That Are High in Vitamin D [Internet]. [cited 2019 Feb  
843 14]. Available from: [https://www.healthline.com/nutrition/9-foods-high-in-vitamin-](https://www.healthline.com/nutrition/9-foods-high-in-vitamin-d)  
844 [d](https://www.healthline.com/nutrition/9-foods-high-in-vitamin-d)
- 845 50. BM A, EM F, SZ A, AE A-A. The Effects of Physical Activity and Sun Exposure  
846 on Vitamin D Status among Children from Jeddah, Saudi Arabia. *J Pediatr Care*  
847 [Internet]. 2016 [cited 2019 Feb 14];02(01). Available from:  
848 [http://pediatrics.imedpub.com/the-effects-of-physical-activity-and-sun-exposure-](http://pediatrics.imedpub.com/the-effects-of-physical-activity-and-sun-exposure-on-vitamin-d-status-among-children-from-jeddah-saudi-arabia.php?aid=8822)  
849 [on-vitamin-d-status-among-children-from-jeddah-saudi-arabia.php?aid=8822](http://pediatrics.imedpub.com/the-effects-of-physical-activity-and-sun-exposure-on-vitamin-d-status-among-children-from-jeddah-saudi-arabia.php?aid=8822)
- 850 51. Jung AM, Dennis LK, Jacobs ET, Wondrak GT. Sun sensitivity and sun protective  
851 behaviors during sun exposure among indoor office workers in the American  
852 Midwest. *Photodermatol Photoimmunol Photomed* [Internet]. 2018 Nov 1 [cited  
853 2019 Feb 14];34(6):393–9. Available from:  
854 <http://www.ncbi.nlm.nih.gov/pubmed/29888418>
- 855 52. Haq A, Wimalawansa SJ, Pludowski P, Anouti F Al. Clinical practice guidelines  
856 for vitamin D in the United Arab Emirates. *J Steroid Biochem Mol Biol* [Internet].  
857 2018 Jan [cited 2018 Oct 1];175:4–11. Available from:  
858 <http://www.ncbi.nlm.nih.gov/pubmed/27693095>
- 859 53. Holick MF, Binkley NC, Bischoff-Ferrari HA, Gordon CM, Hanley DA, Heaney  
860 RP, et al. Evaluation, Treatment, and Prevention of Vitamin D Deficiency: an  
861 Endocrine Society Clinical Practice Guideline. *J Clin Endocrinol Metab* [Internet].  
862 2011 Jul [cited 2019 Feb 14];96(7):1911–30. Available from:  
863 <http://www.ncbi.nlm.nih.gov/pubmed/21646368>
- 864 54. Sadiya A, Ahmed SM, Skaria S, Abusnana S. Vitamin D status and its relationship  
865 with metabolic markers in persons with obesity and type 2 diabetes in the UAE: a  
866 cross-sectional study. *J Diabetes Res* [Internet]. 2014 [cited 2019 Feb  
867 14];2014:869307. Available from: <http://www.ncbi.nlm.nih.gov/pubmed/25371907>
- 868 55. Al Kadi H, Sonbol H. High Prevalence of Vitamin D Deficiency in the Saudi  
869 Population: Is it Overestimated? *Saudi Journal of Internal Medicine*. | Request PDF  
870 [Internet]. [cited 2019 Feb 14]. Available from:  
871 [https://www.researchgate.net/publication/316275475\\_High\\_Prevalence\\_of\\_Vitami](https://www.researchgate.net/publication/316275475_High_Prevalence_of_Vitamin_D_Deficiency_in_the_Saudi_Population_Is_it_Overestimated_Saudi_Journal_of_Internal_Medicine)  
872 [n\\_D\\_Deficiency\\_in\\_the\\_Saudi\\_Population\\_Is\\_it\\_Overestimated\\_Saudi\\_Journal\\_of](https://www.researchgate.net/publication/316275475_High_Prevalence_of_Vitamin_D_Deficiency_in_the_Saudi_Population_Is_it_Overestimated_Saudi_Journal_of_Internal_Medicine)  
873 [\\_Internal\\_Medicine](https://www.researchgate.net/publication/316275475_High_Prevalence_of_Vitamin_D_Deficiency_in_the_Saudi_Population_Is_it_Overestimated_Saudi_Journal_of_Internal_Medicine)
- 874 56. HS S, WF AO. Genotype and Allele Frequencies of Calcium-Sensing Receptor  
875 Gene a986s (rs1801725) Polymorphism in Saudi Adults. *J Genet Disord Genet*  
876 Reports [Internet]. 2016 Dec 5 [cited 2019 Feb 14];5(3). Available from:  
877 [http://www.scitechnol.com/peer-review/genotype-and-allele-frequencies-of-](http://www.scitechnol.com/peer-review/genotype-and-allele-frequencies-of-calciumsensing-receptor-gene-a986s-rs1801725-polymorphism-in-saudi-adults-FYz9.php?article_id=5262)  
878 [calciumsensing-receptor-gene-a986s-rs1801725-polymorphism-in-saudi-adults-](http://www.scitechnol.com/peer-review/genotype-and-allele-frequencies-of-calciumsensing-receptor-gene-a986s-rs1801725-polymorphism-in-saudi-adults-FYz9.php?article_id=5262)  
879 [FYz9.php?article\\_id=5262](http://www.scitechnol.com/peer-review/genotype-and-allele-frequencies-of-calciumsensing-receptor-gene-a986s-rs1801725-polymorphism-in-saudi-adults-FYz9.php?article_id=5262)
- 880 57. Nayak SB, Ramnanansingh TG. Evaluation of vitamin D relationship with type 2  
881 diabetes and systolic blood pressure. *BMJ open diabetes Res care* [Internet]. 2016  
882 Oct 8 [cited 2019 Feb 14];4(1):e000285. Available from:  
883 <http://drc.bmj.com/lookup/doi/10.1136/bmjdr-2016-000285>

- 884 58. Bachali S, Dasu K, Ramalingam K, Naidu JN. Vitamin d deficiency and insulin  
885 resistance in normal and type 2 diabetes subjects. *Indian J Clin Biochem* [Internet].  
886 2013 Jan [cited 2019 Feb 14];28(1):74–8. Available from:  
887 <http://www.ncbi.nlm.nih.gov/pubmed/24381426>
- 888 59. Sadat-Ali M, Al-Elq AH, Al-Shaikh IH, Al-Turki HA, Al-Ali AK, Al-Othman AA.  
889 Assessment of low vitamin D among Saudi Arabians. Did we overshoot the  
890 runway? *Saudi Med J* [Internet]. 2014 Oct [cited 2019 Feb 14];35(10):1243–9.  
891 Available from: <http://www.ncbi.nlm.nih.gov/pubmed/25316470>
- 892 60. Mogahed M. Vitamin D status in patients with type-2 diabetes mellitus in Riyadh  
893 City, Saudi Arabia. *Kasr Al Ainy Med J* [Internet]. 2018 [cited 2019 Feb  
894 14];24(1):19. Available from:  
895 <http://www.kamj.eg.net/text.asp?2018/24/1/19/233106>
- 896 61. Kim D. The Role of Vitamin D in Thyroid Diseases. *Int J Mol Sci* [Internet]. 2017  
897 Sep 12 [cited 2019 Feb 15];18(9). Available from:  
898 <http://www.ncbi.nlm.nih.gov/pubmed/28895880>
- 899 62. Ardawi M-SM, Sibiany AM, Bakhsh TM, Qari MH, Maimani AA. High prevalence  
900 of vitamin D deficiency among healthy Saudi Arabian men: relationship to bone  
901 mineral density, parathyroid hormone, bone turnover markers, and lifestyle factors.  
902 *Osteoporos Int* [Internet]. 2012 Feb 6 [cited 2019 Feb 14];23(2):675–86. Available  
903 from: <http://www.ncbi.nlm.nih.gov/pubmed/21625888>
- 904 63. Eggemoen AR, Knutsen K V, Dalen I, Jennum AK. Vitamin D status in recently  
905 arrived immigrants from Africa and Asia: a cross-sectional study from Norway of  
906 children, adolescents and adults. *BMJ Open* [Internet]. 2013 Oct 23 [cited 2018 Oct  
907 2];3(10):e003293. Available from: <http://www.ncbi.nlm.nih.gov/pubmed/24157818>

908

909

910

911
